# Supplementary material for: Spiritual Care Guide in Hospice∙Palliative Care
Source: PubMed Central journal article supplement — J Hosp Palliat Care. 2023 Dec 1;26(4):149–59. doi: 10.14475/jhpc.2023.26.4.149 (PMC10703561; doi:10.14475/jhpc.2023.26.4.149), 2023-12-01
Supplement: jhpc-26-4-149-supple.pdf [file jhpc-26-4-149-supple.pdf]

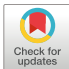

## 호스피스 · 완화의료 영적돌봄 안내

강경아\*, 김도봉<sup>†</sup>, 고수진<sup>†</sup>, 박명희<sup>§</sup>, 박혜윤<sup>||</sup>, 윤득형<sup>¶</sup>, 윤수진<sup>\*\*</sup>, 이수정<sup>††</sup>, 최지은<sup>‡‡</sup>, 한형숙<sup>§§</sup>, 천지영\*

\*삼육대학교 간호대학, <sup>†</sup>지샘병원 전인치유교육원, <sup>‡</sup>울산대학교 의과대학,

<sup>§</sup>가톨릭대학교 서울성모병원 호스피스 · 완화의료센터, <sup>||</sup>서울대학교병원 정신건강의학과, <sup>¶</sup>감리교신학대학교, <sup>\*\*</sup>동백성루카병원,

<sup>††</sup>충남대학교병원 권역호스피스센터, <sup>‡‡</sup>메트로병원, <sup>§§</sup>서울대학교병원 완화의료·임상윤리센터

## Spiritual Care Guide in Hospice · Palliative Care

Kyung-Ah Kang, R.N., Ph.D.\*, Do-Bong Kim, D.Min.<sup>†</sup>, Su-Jin Koh, M.D., Ph.D.<sup>‡</sup>,  
Myung-Hee Park, A.P.N., Ph.D.<sup>§</sup>, Hye Yoon Park, M.D., Ph.D.<sup>||</sup>, Deuk Hyoung Yoon, Ph.D.<sup>¶</sup>,  
Soo-Jin Yoon, R.N., M.S.N.<sup>\*\*</sup>, Su-Jeong Lee, A.P.N., M.S.N.<sup>††</sup>, Ji-Eun Choi, M.S.W.<sup>‡‡</sup>,  
Hyoung-Suk Han, R.N., Ph.D. candidate<sup>§§</sup> and Jiyoung Chun, R.N., Ph.D.\*

\*College of Nursing, Sahmyook University, Seoul,

<sup>†</sup>Holistic Healing Institute, G-Sam Hospital, Gunpo,

<sup>‡</sup>Ulsan University College of Medicine, Ulsan University Hospital, Ulsan,

<sup>§</sup>Hospice & Palliative Care Center, Seoul St. Mary's Hospital, The Catholic University of Korea,

<sup>||</sup>Department of Psychiatry, Seoul National University Hospital, Seoul National University, College of Medicine,

<sup>¶</sup>Methodist Theological University, Seoul,

<sup>\*\*</sup>Dongbaek St. Luke's Hospital, Yongin,

<sup>††</sup>Regional Hospice Center, Chungnam University Hospital, Daejeon,

<sup>‡‡</sup>Metro Hospital, Anyang,

<sup>§§</sup>Center for Palliative Care & Clinical Ethics, Seoul National University Hospital, Seoul, Korea

The Spiritual Care Guide in Hospice · Palliative Care is evidence-based and focuses on the universal and integral aspects of human spirituality—such as meaning and purpose, interconnectedness, and transcendence—which go beyond any specific religion. This guide was crafted to improve the spiritual well-being of adult patients aged 19 and older, as well as their families, who are receiving end-of-life care. The provision of spiritual care in hospice and palliative settings aims to assist patients and their families in finding life's meaning and purpose, restoring love and relationships, and helping them come to terms with death while maintaining hope. It is recommended that spiritual needs and the interventions provided are periodically reassessed and evaluated, with the findings recorded. Additionally, hospice and palliative care teams are encouraged to pursue ongoing education and training in spiritual care. Although challenges exist in universally applying this guide across all hospice and palliative care organizations in Korea—due to varying resources and the specific environments of medical institutions—it is significant that the Korean Society for Hospice and Palliative Care has introduced a spiritual care guide poised to enhance the spiritual well-being and quality of care for hospice and palliative care patients.

**Key Words:** Spirituality, Hospice care, Palliative care, Education

**Received** October 31, 2023  
**Revised** November 1, 2023  
**Accepted** November 2, 2023

**Correspondence to**  
Jiyoung Chun  
ORCID:  
https://orcid.org/0000-0001-8604-5581  
E-mail: chunjy@syu.ac.kr

**Funding/Support**  
This study was supported by the Health Promotion Fund, Ministry of Health & Welfare, Republic of Korea (2360110-1).

This is an Open Access article distributed under the terms of the Creative Commons Attribution Non-Commercial License (<http://creativecommons.org/licenses/by-nc/4.0/>) which permits unrestricted non-commercial use, distribution, and reproduction in any medium, provided the original work is properly cited.

Copyright © 2023 by Korean Society for Hospice and Palliative Care

## 서론

호스피스·완화의료의 목적은 생애말기에 있는 환자와 가족들을 대상으로 그들의 신체, 심리, 사회, 영적인 고통을 경감시키고 삶의 질을 향상 시키는 데 있다[1]. 특별히, 생애말기에 있는 환자를 위한 영적인 지지는 환자의 영적안녕뿐 아니라 삶의 질, 적응, 신체적 안녕, 우울과 불안감소, 돌봄에 대한 만족, 사회적 관계 증진, 생애말기 의사결정과 같은 건강지표에 유의한 긍정적 효과가 있음이 보고되었다[2-4]. 따라서, 영적돌봄은 호스피스·완화의료의 필수적인 영역으로 돌봄의 질에 매우 중요한 영향을 미치는 핵심적인 부분이다[5].

반면, 선행연구에 의하면 호스피스·완화의료팀(이하 호완팀)들은 영적돌봄에 부담감을 가지고 있어 환자들이 호소하는 영적 요구를 충족시키는 데 어려움을 겪고 있음이 확인되었고 이와 관련된 중요한 요인으로 영적돌봄을 종교적 돌봄으로 생각하는 데서 기인하고 있음이 보고되었다[2,6]. 한국문화에서 생애말기에 있는 환자와 가족들이 원하는 영적돌봄에 대한 기대와 호완팀이 인식하는 영적돌봄에 대한 인식을 비교조사한 결과에 의하면 환자와 가족들은 종교적 요구보다는 경청으로 함께함, 희망을 격려, 관계와 의미를 찾자 하는 요구가 더 높았으나 호완팀의 경우 영적돌봄을 종교적 돌봄으로 인식하고 있는 경우가 더 많음이 확인되었다[7,8]. 이러한 결과는 영적돌봄은 대상자의 종교에 대한 고려를 포함하면서 그보다 더 본질적이고 보편적인 인간의 속성인 영성(의미와 목적, 상호관련성, 초월성)에 근거한 접근이 타당함을 시사한다.

영성(spirituality)은 역동적이며 인간성의 본질로서 궁극적 의미, 삶의 목적, 초월성과 함께 자신, 가족, 중요한 사람들, 지역사회, 자연, 신성한 존재 또는 신과의 관계경험을 추구하는 속성이 있으며 이러한 영성은 신념, 가치, 전통, 의식의 수행 등으로 표현된다[5]. 인간은 영적존재로서 이러한 영성의 본질에 근거하

여 환자와 가족의 요구를 충족시키는 영적돌봄이[9-11] 호스피스·완화의료 실무에서 수행되어야 할 필요가 있다.

본 안내서는 생애말기돌봄 의료현장에서 적용할 인간의 본질적이고 보편적인 영성에 근거한 영적돌봄 안내서를 개발하는 데 목적을 두고 다음의 구체적 목적과 방법에 따라 개발되었다.

개발 목적 1. 선행 문헌을 통해 영성에 근거한 영적돌봄에 관련된 과학적 근거를 확인한다. 국외 영적돌봄 가이드라인과 문헌을 검토하였다[4,8,12-20]. 또한 일부 개발팀원들이 Interprofessional Spiritual Care Education Curriculum (ISPEC) (Train-the-Trainer) 과정을 이수한 후, 개발팀원들을 위해 ISPEC 교육과정 6개의 모듈을 3회에 걸쳐 자체교육을 진행하였다.

개발 목적 2. 한국 문화에 맞는 영적 돌봄에 관한 내용을 구성한다. 한국 호스피스·완화의료 현장에 근무하는 호완팀과, 환자 및 가족을 대상으로 그들이 생각하는 영적돌봄에 대한 인식과 돌봄요구 확인을 위한 사전연구[6,7]를 진행하였다. 말기 환자와 가족의 영적돌봄에 관한 국외 가이드라인, 교육과정, 사전연구를 근거로 한국 문화에 적합한 호스피스·완화의료 영적돌봄 안내 초안을 마련하였다.

개발 목적 3. 생애말기 돌봄 현장에서 사용할 수 있는 영적돌봄에 대해 안내한다. 호완팀 중에서 전문성을 갖춘 패널 15명(의사 3명, 원목자 3명, 간호사 6명, 사회복지사 3명)을 대상으로 3회에 걸쳐 델파이 조사를 수행하였다. 최종적으로 델파이 결과를 토대로 한국호스피스·완화의료학회 이사(각 종교 대표 이사 3인 포함)들을 초청하여 『호스피스·완화의료 영적돌봄 안내』에 제시된 용어, 권고 중재 및 전반적인 내용에 대해 상호합의를 위한 워크숍을 개최하였다.

『호스피스·완화의료 영적돌봄 안내』 전체 내용은 중앙호스피스센터(<https://hospice.go.kr>)와 한국호스피스·완화의료학회 홈페이지(<https://www.e-jhpc.org/main.html>)에서 다운로드 가능하다[21].

Table 1. Spiritual Care Principles.

| Principles |                                                                                                                                                                                                                                                                                                           |
|------------|-----------------------------------------------------------------------------------------------------------------------------------------------------------------------------------------------------------------------------------------------------------------------------------------------------------|
| Mission    | 1. Spiritual care is an essential area of hospice and palliative care that helps patients and families explore meaning and value.<br>2. Hospice and palliative care teams aim for a universal and integral human spirituality through an evidence-based approach that transcends any particular religion. |
| Goals      | 1. Help patients and families find meaning and purpose in life.<br>2. Help patients and families restore love and relationships.<br>3. Help patients and families accept death and have hope.                                                                                                             |
| Standards  | Standard 1 (related to spiritual care)<br>Standard 2 (related to spiritual needs assessment)<br>Standard 3 (related to spiritual intervention)<br>Standard 4 (related to spiritual care education and professionals)<br>Standard 5 (related to community engagement)                                      |

# 호스피스 · 완화의료 영적돌봄 안내

## 1. 영적돌봄을 위한 기본개념

『호스피스 · 완화의료 영적돌봄 안내』에 소개되는 영적돌봄을 위한 기본개념은 미국 National Consensus Project (NCP) for Quality Palliative Care [14]에서 제시하는 영적돌봄 가이드라인 제4판, 그 외 국외 선행문헌[22,23]과 한국문화의 특성[6,7]을 반영하여 정의되었다. NCP 가이드라인 5영역(영적돌봄)과 관련된 주요개념을 참고하여 총 8개의 기본개념이 정리되었다. 영성, 종교성, 영적요구, 영적요구사정(선별, 배경, 사정), 영적돌봄제공자에 의한 돌봄의 5개 개념이 정의되었고, 특히, 영적돌봄, 종교적 돌봄, 영적안녕 3개의 개념에 대한 정의가 보다 한국문화에 적절하게 제시되었다[21].

## 2. 영적돌봄 원칙

영적돌봄을 위한 원칙에는 미션, 목표, 표준이 제시되었다. 특별히, 영적돌봄 목표 3개는 영성의 속성인 의미와 목적, 상호관계성, 초월성과 각각 관련되어 있다[4,18,22-24]. 표준 또한 한국호스피스 · 완화의료 현장의 특성을 반영하여 다섯 개로 정리하였다. 표준 4와 5의 경우, 영적돌봄전략으로 최근 강조되고 있는 교육과 훈련 및 지역사회와의 파트너십을 반영하였다[25]. 표준 5개의 세부내용은 참고문헌 22번에 제시되었다(Table 1).

## 3. 영적돌봄 모델

인간의 총체성과 전인적 돌봄을 지향하는 호스피스 · 완화의료에서 인간의 본질인 영성(의미와 목적, 상호관계성, 초월성)을 근간으로[4,18,22-24,26] 영적돌봄을 수행하기 위한 '인간의 총체

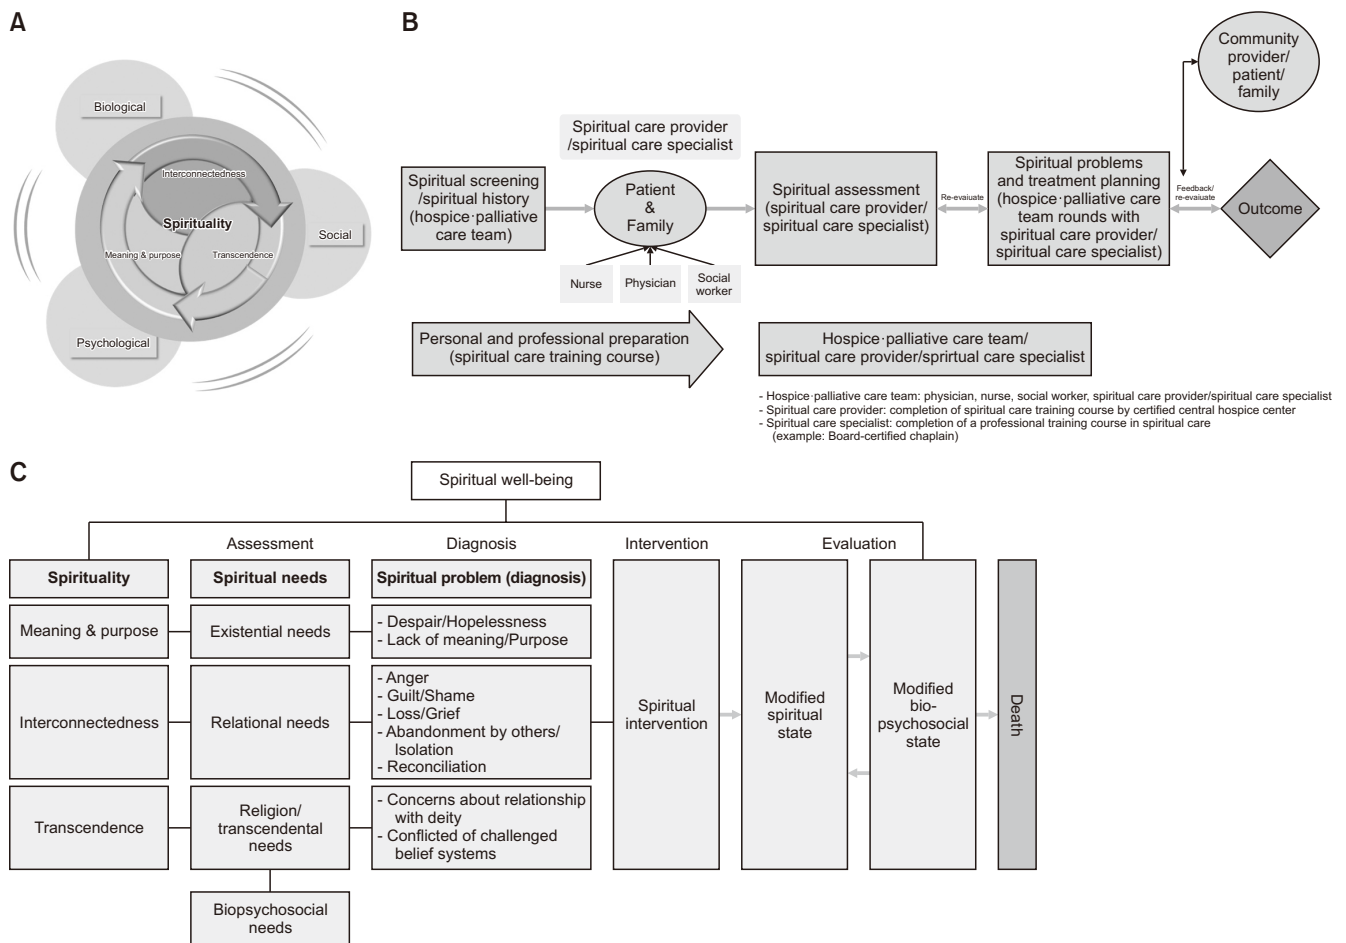

Figure 1. Spiritual care model. (A) The totality of humanity, (B) Spiritual implementation model 1, (C) Spiritual implementation model 2, (D) Spiritual implementation model 3.

Source A: Kang KA, Kim SJ, Kim DB, Park MH, Yoon SJ, Choi SE, et al. A meaning-centered spiritual care training program for hospice palliative care teams in South Korea: development and preliminary evaluation. BMC Palliative Care 2021;20:30.

Source B, D: Puchalski C, Ferrell B, Virani R, Otis-Green S, Baird P, Bull J, et al. Improving the quality of spiritual care as a dimension of palliative care: the report of the Consensus Conference. J Palliat Med 2009;12:885-904.

성' 모델을 제시하였다.

'영적돌봄수행과정 1'은 영적돌봄이 시작되는 처음부터 마지막 까지 전과정의 흐름을 보여주는 모델이다. 이 모델은 Puchalski 등[27]에 의해 발표된 'Inpatient spiritual care implementation model'을 기반으로 한국문화에 맞게 재수정된 모델로서 전국 권역별 호스피스센터와 호스피스전문기관에 실제 적용되는 것을 권고한다. 영적돌봄이 시작되기 위해서는 영적선별, 배경조사가 환자와 가족을 대상으로 호완팀원에 의해 수행되며, 보다 심층적인 면담을 진행하는 영적사정이 그 다음에 이루어진다. 이를 통해 영적문제가 확인되고 영적중재를 위한 계획이 수립된다. 결과가 평가되고 피드백을 통한 주기적인 재평가가 이루어진다. 이 과정에서 환자와 가족 및 그들이 원하는 지역사회 종교지도자의 의견이 반영되는 것이 바람직하겠다.

'영적돌봄수행과정 2'에서는 영성의 3가지 속성(의미와 목적, 상호관계성, 초월성)에 기반하여 영적요구가 분류되었고, 실존적 요구, 관계적 요구, 종교 및 초월적 요구와 관련된 영적문제 9

개가 제시되었다. 확인된 영적문제에 맞는 영적중재 계획수립과 수행이 진행되며, 영적중재가 제공되면 영적상태의 개선이 올 수 있으며 동시에 신체, 심리, 사회적 상태도 개선될 수 있다. 영적돌봄의 최종목표는 죽음에 이르기 전까지 영적안녕을 증진시키는 데 있다.

'영적돌봄수행과정 3'은 Puchalski 등[27]에 의해 발표된 'Spiritual diagnosis decision pathways' 모델을 기반으로, 영성의 3가지 속성에 근거한 영적문제를 결정하는 과정에 초점을 두고 본 영적돌봄 안내(서)에서 수정·보완된 모델이다(Figure 1). 특히, 이 영적문제 결정과정 모델에서는 호완팀에 의해 가능한 영적돌봄 범위를 제시하고 있다. 즉, 실존적, 관계적, 종교 및 초월적 요구가 있을 때에 호완팀에 의해 영적중재를 계획 및 수행하게 된다. 그러나 호완팀에 의한 영적중재를 통해서도 영적문제가 해결되지 않고 환자와 가족이 원하는 종교적 돌봄요구가 있을 때는 해당되는 호스피스·완화의료팀에 속한 영적돌봄전문가 또는 환자가 원하는 종교지도자에게 의뢰하게 되는 과정을 설명하고 있다.

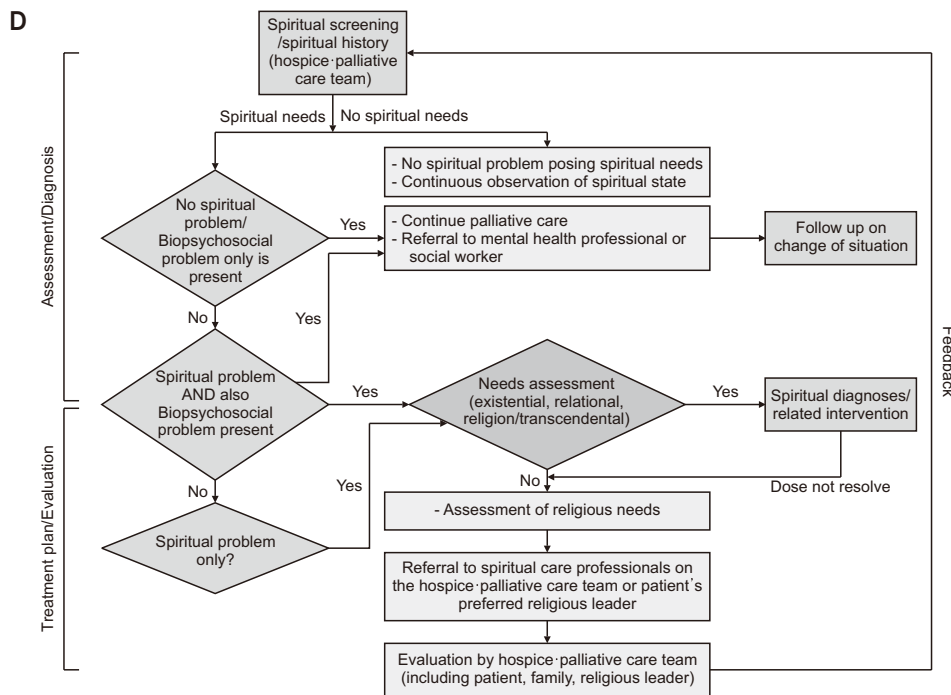

Figure 1. Continued.

Table 2. Three Steps of Assessing Spiritual Needs.

| Division             | Purpose                                                                                           | When                                     | Who                                               |
|----------------------|---------------------------------------------------------------------------------------------------|------------------------------------------|---------------------------------------------------|
| Spiritual screening  | Check spiritual care needs (yes/no)                                                               | First visit                              | Hospice and palliative care team                  |
| Spiritual history    | Based on the attributes of spirituality, identify spiritual needs or spiritual strengths (yes/no) | First visit and periodic reassessment    | Hospice and palliative care team                  |
| Spiritual assessment | Identify spiritual strengths related to attributes of spirituality (specific questions)           | Initial visit and periodic reassessments | Spiritual-care-provider/spiritual care specialist |

Table 3. Spiritual Needs Assessment (Example)

| Spiritual needs based on spiritual attributes                                                                                                                                                                                                                                    | Questions                                                                                                                                                                                                                                                                                                                                                                                                                                                                                                                                                                                                                                                                                                                                                                                                                                                                                                                                                                                                                                                                                                                                                                                                                                                                                                                                                                                                                                                                                                                                                                                                                                                                                                                                                                                                                                                                                                                                                                                                                                                                                                                                                                                                                                                                                                                                                                                                                                                                                                                                                                                                                        |
|----------------------------------------------------------------------------------------------------------------------------------------------------------------------------------------------------------------------------------------------------------------------------------|----------------------------------------------------------------------------------------------------------------------------------------------------------------------------------------------------------------------------------------------------------------------------------------------------------------------------------------------------------------------------------------------------------------------------------------------------------------------------------------------------------------------------------------------------------------------------------------------------------------------------------------------------------------------------------------------------------------------------------------------------------------------------------------------------------------------------------------------------------------------------------------------------------------------------------------------------------------------------------------------------------------------------------------------------------------------------------------------------------------------------------------------------------------------------------------------------------------------------------------------------------------------------------------------------------------------------------------------------------------------------------------------------------------------------------------------------------------------------------------------------------------------------------------------------------------------------------------------------------------------------------------------------------------------------------------------------------------------------------------------------------------------------------------------------------------------------------------------------------------------------------------------------------------------------------------------------------------------------------------------------------------------------------------------------------------------------------------------------------------------------------------------------------------------------------------------------------------------------------------------------------------------------------------------------------------------------------------------------------------------------------------------------------------------------------------------------------------------------------------------------------------------------------------------------------------------------------------------------------------------------------|
| <p>1. Existential needs:<br/>The need to find purpose and meaning in life</p>                                                                                                                                                                                                    | <p>[Spiritual Strengths: The Meaning of Life]</p> <ul style="list-style-type: none"> <li>● Key Questions                             <ul style="list-style-type: none"> <li>- What are the most important purposes (goals), values, and things that matter (or are important) in your life?</li> </ul> </li> <li>● Additional Questions                             <ul style="list-style-type: none"> <li>- What was the most rewarding (or meaningful, or well-done) thing you've ever done in your life?</li> <li>- What have you done so far, and what has it meant in your life?</li> <li>- What are your favorite traits (strengths) about yourself, and how have they helped you in your recent situation?</li> <li>- Do you have any advice or things you'd like to leave behind for your children or the next person in your life?</li> </ul> </li> </ul> <p>[Spiritual Strengths: Seeking meaning]</p> <ul style="list-style-type: none"> <li>● Key Questions                             <ul style="list-style-type: none"> <li>- What gives you the strength to endure the current situation?</li> </ul> </li> <li>● Additional Questions                             <ul style="list-style-type: none"> <li>- When you look back on your life, what do you think it was like?</li> <li>- What was the biggest crisis you've faced in your life, and what gave you the strength to get through it?</li> <li>- What has most influenced your life purpose?</li> <li>- If you lose a part of your body or a bodily function, how will it affect the meaning and purpose of (your) life?</li> <li>- How has your illness changed your life goals?</li> </ul> </li> </ul>                                                                                                                                                                                                                                                                                                                                                                                                                                                                                                                                                                                                                                                                                                                                                                                                                                                                                                                                                |
| <p>Spiritual needs, spiritual problems (diagnosis), and spiritual strengths (examples)</p>                                                                                                                                                                                       |                                                                                                                                                                                                                                                                                                                                                                                                                                                                                                                                                                                                                                                                                                                                                                                                                                                                                                                                                                                                                                                                                                                                                                                                                                                                                                                                                                                                                                                                                                                                                                                                                                                                                                                                                                                                                                                                                                                                                                                                                                                                                                                                                                                                                                                                                                                                                                                                                                                                                                                                                                                                                                  |
| <p>Example 2<br/><u>Spiritual needs manifestation</u><br/><i>Spiritual strengths</i></p> <p>Spiritual needs identified in the case</p> <p>Spiritual problems (Diagnosis)<br/>(number: priority)</p> <p>The spiritual strengths of the case<br/>(underline the relevant part)</p> | <p>Mr. Pyeon (male/83 years old) received radiation therapy for prostate cancer. Two years later, he was diagnosed with neuroendocrine cancer of the pancreas and was treated with chemotherapy. After the disease progressed and chemotherapy was discontinued, he enrolled in a home hospice program.</p> <p>He had previously worked as a local government employee and had been transferred frequently, <b>so he was often away from his family when raising his two children.</b> He expressed that he had met his wife through an arranged marriage and they lived together, but he has never had a deep conversation with her and does not have much affection for her. He doesn't have much time for hobbies or leisure outside of work, so when he thinks back on his life, he doesn't have many pleasant memories.</p> <p>After being diagnosed with a terminal illness, he expressed that he thought <b>it was right to sacrifice and do his best to raise and feed his family when she was younger</b>, but now he is full of regret and resentment because he has difficulty moving around due to lower extremity edema and is confined to his home and cannot live alone without help from others.</p> <p>"It's so unfair, I thought this was the way I was supposed to live, <b>but now I look back and I don't see myself in my life.</b> I'm just a slave, I'm just a person who's locked up and told what to do. I've never been happy, it feels so unfair that I've lived this way."</p> <p>As his illness progressed and his delirium increased, he became unable to recognize his family members and became aggressive, screaming "Don't lock me up! Open the door!" and became aggressive, <u>wielding a bat, running out of the house and injuring himself.</u> "There are soldiers standing guard over me, keeping an eye on me, making me do things. Please help me."</p> <ul style="list-style-type: none"> <li>● Existential needs: the need to find purpose and meaning in life.</li> <li>● Relational needs: the need for love, connection, and harmonious relationships with oneself and significant others.</li> </ul> <ul style="list-style-type: none"> <li>● Lack of meaning and purpose (①)</li> <li>● Anger (②)</li> <li>● Despair and hopelessness (③)</li> </ul> <ul style="list-style-type: none"> <li>● The meaning of life</li> <li>● <u>Trying to find meaning</u></li> <li>● <u>Love (altruistic)</u></li> <li>● Gratitude</li> <li>● Compassion and forgiveness</li> <li>● Belief or faith</li> <li>● Tranquility</li> <li>● Acceptance</li> <li>● Hope for the afterlife</li> </ul> |

**Table 4.** Spirituality-based Care Continuum (Example).

| Spirituality property | Spiritual strengths                                                                                                                                                                                                                                                                        | Spiritual needs based on spirituality attributes                 | Expressing spiritual needs                                                                                                                                                                                                                                                                                                                                                                                                                            |                                                                                                                                                                                                                                                                                                   | Spiritual matters           | Intervention goals                              | Spiritual intervention                                                                                                                                                                                                                                                                                                                                                                                                                                                             | Spiritual assessment (6-point scale)                | End result           |
|-----------------------|--------------------------------------------------------------------------------------------------------------------------------------------------------------------------------------------------------------------------------------------------------------------------------------------|------------------------------------------------------------------|-------------------------------------------------------------------------------------------------------------------------------------------------------------------------------------------------------------------------------------------------------------------------------------------------------------------------------------------------------------------------------------------------------------------------------------------------------|---------------------------------------------------------------------------------------------------------------------------------------------------------------------------------------------------------------------------------------------------------------------------------------------------|-----------------------------|-------------------------------------------------|------------------------------------------------------------------------------------------------------------------------------------------------------------------------------------------------------------------------------------------------------------------------------------------------------------------------------------------------------------------------------------------------------------------------------------------------------------------------------------|-----------------------------------------------------|----------------------|
|                       |                                                                                                                                                                                                                                                                                            |                                                                  | Key Aspects                                                                                                                                                                                                                                                                                                                                                                                                                                           | Example                                                                                                                                                                                                                                                                                           |                             |                                                 |                                                                                                                                                                                                                                                                                                                                                                                                                                                                                    |                                                     |                      |
| Meaning and purpose   | <ul style="list-style-type: none"> <li>• Meaning of life</li> <li>• Trying to find meaning</li> <li>• Love</li> <li>• Gratitude</li> <li>• Compassion/ Forgiveness</li> <li>• Beliefs or beliefs</li> <li>• Tranquility</li> <li>• Acceptance</li> <li>• Hope for the afterlife</li> </ul> | Existential needs (the need to find purpose and meaning in life) | <ul style="list-style-type: none"> <li>• No hope for future health and life</li> <li>• State of hopelessness</li> </ul>                                                                                                                                                                                                                                                                                                                               | <ul style="list-style-type: none"> <li>• "My life is getting shorter and shorter"</li> <li>• "There is no reason for me to live"</li> <li>• "I don't want to live"</li> <li>• "I don't know what lies ahead of me"</li> </ul>                                                                     | Despair and hopelessness    | Finding hope and meaning (Hope)                 | <ul style="list-style-type: none"> <li>• Help the patient express their feelings of hopelessness and listen and empathize with them.</li> <li>• Try to have conversations that take the weight of reality off the patient's shoulders.</li> <li>• Help to find ways to make the patient's time count.</li> <li>• Find something to do together that will motivate the patient's (e.g., create a bucket list).</li> </ul>                                                           | Regain motivation through hope and finding meaning. | Spiritual well-being |
|                       |                                                                                                                                                                                                                                                                                            |                                                                  | <ul style="list-style-type: none"> <li>• Lack of meaning</li> <li>• Questions about the meaning of one's existence</li> <li>• Questions about the meaning of pain</li> <li>• Seeking spiritual help</li> <li>• A sense of futility about one's life</li> <li>• Falling apart.</li> <li>• Desperate attitude</li> <li>• Apathy, indifference, depression, helplessness</li> <li>• Expression of futility</li> <li>• One's own worthlessness</li> </ul> | <ul style="list-style-type: none"> <li>• "My life (my life) is meaningless"</li> <li>• "I feel useless"</li> <li>• "What's the point of living like this?"</li> <li>• "It's all for nothing"</li> <li>• "I don't know what the future holds"</li> <li>• "Why do I have to be so sick?"</li> </ul> | Lack of meaning and purpose | Finding hope and meaning (Meaning of suffering) | <ul style="list-style-type: none"> <li>• Listen when the patient expresses skepticism about the value of life.</li> <li>• Help the patient gain awareness of reality through listening and counseling.</li> <li>• Inform the patient that their life has meaning and purpose.</li> <li>• Provide opportunities for visits by family and friends who are meaningful to the patient.</li> <li>• Confirm that the patient is worthy of care through warm physical support.</li> </ul> | Find hope and rewarding meaning.                    |                      |



따라서 호완팀에 의한 영적돌봄은 영성에 근거한 돌봄을 제공하게 되며, 특정 종교적 돌봄은 환자가 원하는 종교지도자에게 의뢰하는 것이 호완팀의 역할이 된다[21].

#### 4. 영적돌봄 과정

영적돌봄 과정에서는 영적요구사정, 영성에 근거한 돌봄 연계 표, 영적돌봄 기록을 위한 서식, 권고 영적 중재를 제시하였다. 또한 부록에 영적요구, 영적문제(진단), 영적강점 사례를 제시하여 호완팀들의 실제 적용을 용이하게 하였다[21].

인간의 영성의 속성에 근거하여 영적요구를 분류하였다. 영적요구사정의 3단계는 종교유무를 확인하는 그 이상의 과정이다. 환자의 삶을 의미있게 하는 것(귀하의 삶을 의미있게 하는 것은 무엇인가요?), 환자의 마음에 힘과 위로가 되는 것(귀하의 마음에 힘과 위로가 되는 것은 무엇인가요?)을 파악하여 그들이 살아가는 이유 또는 동기에 관한 보다 깊은 이해를 하기 위함이다 (Table 2) [1,28].

영적돌봄과 요구사정의 핵심은 환자로 하여금 그들의 영적 강점을 인식하도록 돕는 데 있다[14]. 따라서 영적요구사정부터 중재 및 평가의 전 과정은 영적문제 중심이 아닌 대상자의 영적강점을 확인하고 이를 격려함으로써 영적안녕에 이르도록 하는 데 목표를 두었다. 영성의 속성인 '의미와 목적'에 해당되는 실존적 요구에는 2개의 영적문제(절망과 희망 없음, 의미와 목적의 결핍), '상호관계성'에 해당되는 관계적 요구에는 5개의 영적문제(분노, 죄책감과 수치심, 상실과 애도, 타인에게 버려짐/고립, 화해 원함), '초월성'에 해당되는 종교 및 초월적 요구에는 2개의 영적문제(신과의 관계에 대한 염려, 신념체계의 갈등/도전)가 확인될 수 있다(Table 2, 3).

기본 영적중재(경청, 기도/명상, 함께함 등) 외에 로고테라피, 존엄치료, 마음챙김기반치료, 인생그래프가 영적중재로 권고되었다(Table 4). 기록과 평가를 위해 개발된 '영적돌봄 기록지' 내용 또한 영성의 3가지 속성(의미와 목적, 상호관계성, 초월성)에 근거하여 영적요구사정과 영적진단 및 중재가 진행된 것을 기록하고 평가할 수 있도록 개발되었다(Appendix 1). 아울러 개발된 이 서식은 영적돌봄 질관리를 위해 호스피스·완화의료기관에서 사용되기를 권고한다.

#### 5. 영적돌봄 인력

영적돌봄을 위해서는 영적돌봄제공자와 영적돌봄전문가가 필요함이 본 안내서에서 제안되었다. 한국호스피스·완화의료학회와 중앙호스피스센터의 협력사업으로 온라인과정으로 제공하는 영적돌봄 교육과정을 이수한 호완팀이라면 영적돌봄제공자 역할을 할 수 있다고 권고하였다. 영적돌봄제공자는 영적사정의 기본

단계인 선별검사나 배경조사를 수행한다. 영적돌봄전문가를 배출하는 교육 및 훈련과정에 대해서는 앞으로 많은 합의가 필요하다. 영적돌봄전문가는 대상자의 영적강점을 보다 구체적으로 확인하는 영적사정을 수행하는 역할을 한다[27].

#### 6. 영적돌봄 질관리

영적돌봄 질관리를 위한 평가내용으로 영적돌봄을 위한 지침유무, 기록유무, 사별가족 만족도 조사[29]를 권고하였다.

### 결론

국내 호스피스·완화의료기관의 근무여건과 호완팀원의 인력 지원체계 등이 기관마다 다양하여 모든 기관에 충족될 수 있고 시행가능한 영적돌봄(안내)을 개발하는 데는 한계가 있었다. 본 안내서는 처음 개발된 초안으로서 앞으로 호스피스·완화의료 실무현장에서 적용가능한 안내서가 되기 위해서는 지속적인 수정 및 보완이 필요하다. 추후 델파이 조사와 각 권역별 실무전문가들의 의견을 반영하여 보다 한국문화에 맞고, 현장에서 적용가능한 영적돌봄(안내)을 위한 지침이 개발될 수 있을 것이라 생각된다. 이를 통해 모든 호스피스·완화의료 기관뿐 아니라 생애말기돌봄이 제공되는 의료현장에서 영적돌봄이 중요한 영역으로 실천되어 환자와 가족들의 영적안녕과 삶의 질이 증진되고 돌봄의 질 향상에 기여하게 되기를 바란다.

### 요약

호스피스·완화의료 영적돌봄 안내(서)는 근거중심적이고, 특정 종교를 초월한 인간의 보편적이며 통합적인 영성(의미와 목적, 상호관계성, 초월성)을 지향하며, 생애말기돌봄을 받는 만 19세 이상의 성인환자와 가족을 대상으로 그들의 영적안녕 증진을 목표로 개발되었다. 호스피스·완화의료영역에서 제공되는 영적돌봄은 환자와 가족이 삶의 의미와 목적을 발견하도록 돕고, 사랑과 관계회복을 도우며, 죽음을 수용하고 희망을 갖도록 돕는데 목적을 둔다. 영적요구사정 및 제공된 영적중재는 주기적인 재사정과 평가를 수행하고 그 결과를 기록하도록 권고하며, 호스피스·완화의료팀은 영적돌봄을 위한 계속교육과 훈련이 필요하다. 국내 모든 호스피스·완화의료기관에 본 안내(서)를 적용하기에는 각 기관의 활용가능한 자원과 의료기관 환경 등으로 한계가 있지만, 호스피스·완화의료 대상자의 영적안녕과 돌봄의 질 향상에 기여할 수 있는 영적돌봄 안내(서)를 본 학회가 제시하였다는 측면에서 큰 의미가 있다.

**중심단어:** 영성, 호스피스돌봄, 완화돌봄, 교육

## CONFLICT OF INTEREST

No potential conflict of interest relevant to this article was reported.

## ORCID

Kyung-Ah Kang, <https://orcid.org/0000-0002-3799-9554>

Do-Bong Kim, <https://orcid.org/0009-0000-6497-9412>

Su-Jin Koh, <https://orcid.org/0000-0002-1545-8036>

Myung-Hee Park, <https://orcid.org/0000-0002-7256-8151>

Hye Yoon Park, <https://orcid.org/0000-0003-4114-5102>

Deuk Hyoung Yoon, <https://orcid.org/0009-0002-9048-4960>

Soo-Jin Yoon, <https://orcid.org/0009-0002-6156-3854>

Su-Jeong Lee, <https://orcid.org/0000-0002-3969-5968>

Ji-Eun Choi, <https://orcid.org/0009-0008-5971-272X>

Hyoung-Suk Han, <https://orcid.org/0000-0001-6666-6962>

Jiyoung Chun, <https://orcid.org/0000-0001-8604-5581>

## AUTHOR'S CONTRIBUTIONS

Conception or design of the work: all authors. Data collection: all authors. Data analysis and interpretation: all authors. Drafting the article: KAK, JC. Critical revision of the article: all authors. Final approval of the version to be published: KAK, JC.

## REFERENCES

- Balboni TA, Fitchett G, Handzo GF, Johnson KS, Koenig HG, Pargament KI, et al. State of the science of spirituality and palliative care research part II: screening, assessment, and interventions. *J Pain Symptom Manage* 2017;54:441-53.
- Cherny NI, Fallon MT, Kaasa S, et al. *Oxford textbook of palliative medicine*. 5th ed. Oxford: Oxford University Press; 2015.
- Groot M, Ebenau AF, Koning H, Visser A, Leget C, van Laarhoven HWM, et al. Spiritual care by nurses in curative cancer care: protocol for a national, multicentre, mixed method study. *J Adv Nurs* 2017;73:2201 - 7.
- Hoosen M, Roman NV, Mthembu TG. The development of guidelines for the inclusion of spirituality and spiritual care in unani tibb practice in South Africa: a study protocol. *J Relig Health* 2022;61:1261-81.
- Jafari N, Farajzadegan Z, Zamani A, Bahrami F, Emami H, Loghmani A. Spiritual well-being and quality of life in Iranian women with breast cancer undergoing radiation therapy. *Support Care Cancer* 2013;21:1219-25.
- Kang KA, Choi YS. Comparison of the spiritual needs of terminal cancer patients and their primary family caregivers. *Korean J Hosp Palliat Care* 2020;23:55-70.
- Kang KA, Kim SJ. Comparison of perceptions of spiritual care among patients with life-threatening cancer, primary family caregivers and hospice/palliative care nurses in South Korea. *J Hosp Palliat Nurs* 2020;22:532-51.
- Moosavi S, Borhani F, Akbari ME, Sane N, Rohani C. Recommendations for spiritual care in cancer patients: a clinical practice guideline for oncology nurses in Iran. *Support Care Cancer* 2020;28:5381-95.
- NHS. Standards for spiritual care services in the NHS in Wales [Internet]. London: National Health Service; 2009 [cited 2023 Oct 28]. Available from: <http://www.wales.nhs.uk>.
- Puchalski CM, Vitillo R, Hull SK, Reller N. Improving the spiritual dimension of whole person care: reaching national and international consensus. *J Palliat Med* 2014;17:642-56.
- Salsman JM, Pustejovsky JE, Jim HS, Munoz AR, Merluzzi TV, George L, et al. A meta-analytic approach to examining the correlation between religion/spirituality and mental health in cancer. *Cancer* 2015;121:3769-78.
- Spiritual Health Association. Guidelines for quality spiritual care in health. Melbourne: Spiritual Health Association; 2020.
- Agora Spiritual Care Guideline Working Group. *Spiritual Care: National Guideline*. version: 1.0. Oncoline. Groningen: Integraal Kankercentrum Noord-Nederland; 2013.
- National Consensus Project for Quality Palliative Care. Clinical practice guidelines for quality palliative care, 4th ed [Internet]. Richmond, VA: National Coalition for Hospice and Palliative Care; 2018 [cited 2023 Oct 28]. Available from: <https://www.nationalcoalitionhpc.org/ncp>.
- American National Red Cross. Disaster spiritual care standards and procedures, disaster cycle services standards and procedures, DCS SP Respond. [Washington]: American National Red Cross; c2015.
- Nolan S, Saltmarsh P, Leget C. Spiritual care in palliative care: working towards and EAPC Task Force. *European J Palliat Care* 2011;18:86-9.
- Spiritual Health Association. Guidelines for quality spiritual care in health. Melbourne: Spiritual Health Association; 2020.
- Cooper D, Barnes P, Horst G. How spiritual care practitioners provide care In Canadian hospice palliative care settings: Recommended advanced practice guidelines and commentary. Ottawa: Spiritual Advisors Interest Group, Canadian Hospice Palliative Care Association; 2013.
- Providence Health and Services. Standards of excellence for spiritual care [Internet]. Milwaukee, WI: National Association of Catholic Chap-



- lains: 2007 [cited 2023 Oct 28]. Available from: <https://www.nacc.org>.
20. University of Hull, Staffordshire and Aberdeen. *Spiritual care at the end of life: a systematic review of the literature*. London, SE: Department of Health: 2011.
  21. Korean Society for Hospice and Palliative Care. *Spiritual care guideline in hospice · palliative care*. Seoul: Korean Society for Hospice and Palliative Care: 2022.
  22. Braam AW. Towards a multidisciplinary guideline religiousness, spirituality, and psychiatry: what do we need? *Mental Health, Religion & Culture* 2017;20:579–88.
  23. Freire J, Moleiro C. Religiosity, Spirituality, and Mental Health in Portugal: a call for a conceptualization, relationship, and guidelines for integration (a theoretical review). *Psicologia* 2015;29:17–32.
  24. Moreira-Almeida A, Koenig HG, Lucchetti G. Clinical implications of spirituality to mental health: review of evidence and practical guidelines. *Braz J Psychiatry* 2014;36:176–82.
  25. National Health Service. *Spiritual care strategy 2023–2026*. Clydebank: NHS Golden Jubilee: 2023.
  26. Kang KA, Kim SJ, Kim DB, Park MH, Yoon SJ, Choi SE, et al. A meaning-centered spiritual care training program for hospice palliative care teams in South Korea: development and preliminary evaluation. *BMC Palliative Care* 2021;20:30.
  27. Puchalski C, Ferrell B, Virani R, Otis-Green S, Baird P, Bull J, et al. Improving the quality of spiritual care as a dimension of palliative care: the report of the Consensus Conference. *J Palliat Med* 2009;12:885–904.
  28. Taylor EJ. Chapter 34. Spiritual screening, history, and assessment. In: Ferrell BR, Paice JA, eds. *Oxford textbook of palliative nursing*. 5th ed. New York:Oxford University Press:2019.
  29. Park JK. Reflections and implications of the hospice quality outcomes reporting program (HQRP) in the United States. *HIRA Policy Brief* 2017;11:63–74.

**Appendix 1. Spiritual Care Record (Recommended).**

| Spiritual Care Record                                                                                     |                                                                                                                                                                                                                                                                                                                 |
|-----------------------------------------------------------------------------------------------------------|-----------------------------------------------------------------------------------------------------------------------------------------------------------------------------------------------------------------------------------------------------------------------------------------------------------------|
| <b>1. Basic information</b>                                                                               |                                                                                                                                                                                                                                                                                                                 |
| Patient name                                                                                              | No                                                                                                                                                                                                                                                                                                              |
| Diagnosis                                                                                                 | Sex/Age                                                                                                                                                                                                                                                                                                         |
| <b>2. Spiritual information</b>                                                                           |                                                                                                                                                                                                                                                                                                                 |
| Religious                                                                                                 | <input type="checkbox"/> Yes ( <input type="checkbox"/> Catholic <input type="checkbox"/> Christianity <input type="checkbox"/> Buddhism <input type="checkbox"/> Won-Buddhism <input type="checkbox"/> Others____ ) <input type="checkbox"/> No                                                                |
| Religion                                                                                                  | Importance of religion <input type="checkbox"/> Important <input type="checkbox"/> Moderate <input type="checkbox"/> Not important                                                                                                                                                                              |
|                                                                                                           | Participation in activities <input type="checkbox"/> Always <input type="checkbox"/> Often <input type="checkbox"/> Sometimes <input type="checkbox"/> Seldom <input type="checkbox"/> Other                                                                                                                    |
|                                                                                                           | Support by religious groups <input type="checkbox"/> High <input type="checkbox"/> Moderate <input type="checkbox"/> Low                                                                                                                                                                                        |
| No religion                                                                                               | Concern about religion <input type="checkbox"/> Yes <input type="checkbox"/> No                                                                                                                                                                                                                                 |
|                                                                                                           | Desired religion <input type="checkbox"/> Catholic <input type="checkbox"/> Christianity <input type="checkbox"/> Buddhism <input type="checkbox"/> Won-Buddhism <input type="checkbox"/> Other                                                                                                                 |
|                                                                                                           | Desired spiritual resources <input type="checkbox"/> Yes ( <input type="checkbox"/> Myself <input type="checkbox"/> Family <input type="checkbox"/> Medical staff <input type="checkbox"/> Supreme being/Nature <input type="checkbox"/> Other ) <input type="checkbox"/> None                                  |
| Religion of primary caregiver                                                                             | <input type="checkbox"/> Yes ( <input type="checkbox"/> Catholic <input type="checkbox"/> Christianity <input type="checkbox"/> Buddhism <input type="checkbox"/> Won-Buddhism <input type="checkbox"/> Other )<br><input type="checkbox"/> None                                                                |
| <b>3. Spiritual screening: Identify spiritual care needs</b>                                              |                                                                                                                                                                                                                                                                                                                 |
| Do you want to talk about your life?                                                                      | <input type="checkbox"/> Yes <input type="checkbox"/> No                                                                                                                                                                                                                                                        |
| What kind of help do you need?                                                                            | <input type="checkbox"/> Listening <input type="checkbox"/> Spiritual conversation/Consultation<br><input type="checkbox"/> Religious ritual <input type="checkbox"/> Prayer/Meditation<br><input type="checkbox"/> Will/Donation/Meaningful preparation <input type="checkbox"/> Others (                    ) |
| <b>4. Spiritual history: Identify spiritual needs or spiritual strengths based on spirituality</b>        |                                                                                                                                                                                                                                                                                                                 |
| Do you think your life has been meaningful?                                                               | <input type="checkbox"/> Yes <input type="checkbox"/> No                                                                                                                                                                                                                                                        |
| Are there people around you who are always willing to help?                                               | <input type="checkbox"/> Yes <input type="checkbox"/> No                                                                                                                                                                                                                                                        |
| Is there anything that gives you strength and comfort right now?                                          | <input type="checkbox"/> Yes <input type="checkbox"/> No                                                                                                                                                                                                                                                        |
| Is there something you really want to do (a wish)?                                                        | <input type="checkbox"/> Yes <input type="checkbox"/> No                                                                                                                                                                                                                                                        |
| <b>5. Spiritual assessment: Identify spiritual strengths related to spirituality (specific questions)</b> |                                                                                                                                                                                                                                                                                                                 |
| Spiritual strengths                                                                                       | <input type="checkbox"/> Meaning in life <input type="checkbox"/> Trying to find meaning                                                                                                                                                                                                                        |
|                                                                                                           | <input type="checkbox"/> Love (Altruistic) <input type="checkbox"/> Gratitude <input type="checkbox"/> Compassion and forgiveness                                                                                                                                                                               |
|                                                                                                           | <input type="checkbox"/> Belief or faith <input type="checkbox"/> Peace <input type="checkbox"/> Acceptance <input type="checkbox"/> Hope for an afterlife                                                                                                                                                      |
|                                                                                                           | <input type="checkbox"/> Others (                    )                                                                                                                                                                                                                                                          |
| <b>6. Spiritual Problem (diagnosis)</b>                                                                   |                                                                                                                                                                                                                                                                                                                 |
| Spiritual problem (diagnosis)                                                                             | <input type="checkbox"/> Despair/Hopelessness <input type="checkbox"/> Lack of meaning/purpose                                                                                                                                                                                                                  |
|                                                                                                           | <input type="checkbox"/> Anger <input type="checkbox"/> Guilt/shame <input type="checkbox"/> Loss/Grief <input type="checkbox"/> Abandonment by others/Isolation <input type="checkbox"/> Reconciliation                                                                                                        |
|                                                                                                           | <input type="checkbox"/> Concerns about relationship with deity <input type="checkbox"/> Conflicted or challenged belief systems                                                                                                                                                                                |
| <b>7. Spiritual intervention</b>                                                                          |                                                                                                                                                                                                                                                                                                                 |
| Spiritual intervention                                                                                    | <input type="checkbox"/> Listening <input type="checkbox"/> Spiritual conversation/Consultation                                                                                                                                                                                                                 |
|                                                                                                           | <input type="checkbox"/> Religious ritual <input type="checkbox"/> Prayer/Meditation <input type="checkbox"/> Will/Donation/Meaningful preparation                                                                                                                                                              |
|                                                                                                           | <input type="checkbox"/> Recommended Spiritual Interventions (Logotherapy/dignity therapy/<br>Mindfulness based intervention/Lifegraph) <input type="checkbox"/> Others (                    )                                                                                                                  |
|                                                                                                           | Subjective statements:                                                                                                                                                                                                                                                                                          |

**8. Spiritual well-being evaluation**

**1) Evaluation of spiritual interventions based on 9 spiritual problems (diagnosis)**

|   | Spiritual problem (diagnosis)           | Goal                                                     | Evaluation                                                           | Not at all | A little bit | Somewhat | Quite a bit | A great deal | Does not apply |
|---|-----------------------------------------|----------------------------------------------------------|----------------------------------------------------------------------|------------|--------------|----------|-------------|--------------|----------------|
| 1 | Despair/<br>Hopelessness                | Finding hope and meaning (Hope)                          | Regain motivation through hope and finding meaning.                  |            |              |          |             |              |                |
| 2 | Lack of meaning/<br>Purpose             | Finding hope and meaning (Meaning of suffering)          | Find hope and rewarding meaning.                                     |            |              |          |             |              |                |
| 3 | Anger                                   | Love and Restoring relationships (Gratitude)             | Restore love and relationships through gratitude.                    |            |              |          |             |              |                |
| 4 | Guilt/Shame                             | Love and Restoring relationships (Forgiveness)           | Restore love and relationships through forgiveness.                  |            |              |          |             |              |                |
| 5 | Loss/Grief                              | Love and Restoring relationships (Acceptance of reality) | Restore love and relationships through acceptance of reality         |            |              |          |             |              |                |
| 6 | Abandonment by others/<br>Isolation     | Love and Restoring relationships (Bonding)               | Restore love and relationships through having a bond.                |            |              |          |             |              |                |
| 7 | Reconciliation                          | Love and Restoring relationships (Reconciliation)        | Restore love and relationships through reconciliation.               |            |              |          |             |              |                |
| 8 | Concerns about relationship with deity  | Restoration of relationship with God (Hope)              | Restore love and relationships through finding hope.                 |            |              |          |             |              |                |
| 9 | Conflicted or challenged belief systems | Hope for an afterlife                                    | Restore love and relationships through having hope for an afterlife. |            |              |          |             |              |                |

**2) Comprehensive evaluation: Final outcome after spiritual intervention, "Improvement in spiritual well-being"**

| Attributes of spirituality |   | Items                                                    | Not at all | Somewhat | A great deal | Does not apply |
|----------------------------|---|----------------------------------------------------------|------------|----------|--------------|----------------|
| Meaning and purpose        | 1 | I have meaning and purpose in life.                      |            |          |              |                |
|                            | 2 | My life has been a positive experience.                  |            |          |              |                |
| Interconnectedness         | 3 | I am satisfied with my life and the life around me.      |            |          |              |                |
|                            | 4 | I want to share love and forgiveness.                    |            |          |              |                |
|                            | 5 | I want to have a good relationship.                      |            |          |              |                |
| Transcendence              | 6 | I am in a harmonious relationship with my beliefs/faith. |            |          |              |                |
|                            | 7 | I take comfort in my beliefs/faith.                      |            |          |              |                |
|                            | 8 | I am finishing my life well.                             |            |          |              |                |

Record date:

Signature:
